# Supplementary material for: RVG Peptide-Functionalized Favipiravir Nanoparticle Delivery System Facilitates Antiviral Therapy of Neurotropic Virus Infection in a Mouse Model
Source: MDPI journal article supplement (doi:10.3390/ijms24065851), 2023-03-19
Supplement: s1 [file s1]

**Table S1.** List of data of concentrations and peak areas used in the standard curve of T-705.

| T-705 concentrations ( $\mu\text{g/mL}$ ) | Values of peak area |
|-------------------------------------------|---------------------|
| 40                                        | 878559              |
| 30                                        | 648929              |
| 20                                        | 426560              |
| 10                                        | 213644              |
| 5                                         | 106126              |
